# Supplementary material for: Identification of Molecular Subtypes in Head and Neck Squamous Cell Carcinoma Based on Dysregulated Immune LncRNAs
Source: Hindawi journal article supplement (doi:10.1155/2022/9702789), 2022-01-25
Supplement: f1 [file 9702789.f1.pdf]

**Supplementary Table S1: Molecular subtype infor**

|                 |    |
|-----------------|----|
| TCGA-CR-5250-01 | C1 |
| TCGA-CV-6942-01 | C1 |
| TCGA-CV-A463-01 | C1 |
| TCGA-CV-6436-01 | C1 |
| TCGA-CQ-A4CH-01 | C1 |
| TCGA-CQ-A4CE-01 | C1 |
| TCGA-WA-A7H4-01 | C1 |
| TCGA-F7-A620-01 | C1 |
| TCGA-DQ-5624-01 | C1 |
| TCGA-CQ-7071-01 | C1 |
| TCGA-CR-7371-01 | C1 |
| TCGA-CN-6992-01 | C1 |
| TCGA-D6-A74Q-01 | C1 |
| TCGA-CV-7263-01 | C1 |
| TCGA-BA-6870-01 | C1 |
| TCGA-MT-A7BN-01 | C1 |
| TCGA-BA-6873-01 | C1 |
| TCGA-CV-6959-01 | C1 |
| TCGA-CR-7377-01 | C1 |
| TCGA-CV-5430-01 | C1 |
| TCGA-CN-A497-01 | C1 |
| TCGA-CV-5978-01 | C1 |
| TCGA-CV-A468-01 | C1 |
| TCGA-CV-6952-01 | C1 |
| TCGA-D6-6826-01 | C1 |
| TCGA-TN-A7HI-01 | C1 |
| TCGA-UF-A7JJ-01 | C1 |
| TCGA-CR-6478-01 | C1 |
| TCGA-UF-A719-01 | C1 |
| TCGA-UF-A7JT-01 | C1 |
| TCGA-CR-7367-01 | C1 |
| TCGA-QK-A6IF-01 | C1 |
| TCGA-D6-A6EO-01 | C1 |
| TCGA-CN-A63T-01 | C1 |
| TCGA-D6-A4ZB-01 | C1 |
| TCGA-CR-7380-01 | C1 |
| TCGA-D6-6517-01 | C1 |
| TCGA-CV-7254-01 | C1 |
| TCGA-QK-A6IJ-01 | C1 |
| TCGA-CV-6935-01 | C1 |
| TCGA-CR-7379-01 | C1 |
| TCGA-CN-A498-01 | C1 |
| TCGA-BA-A6DL-01 | C1 |
| TCGA-CR-7370-01 | C1 |
| TCGA-CR-6484-01 | C1 |
| TCGA-CR-7390-01 | C1 |
| TCGA-CQ-5325-01 | C1 |
| TCGA-DQ-5629-01 | C1 |
| TCGA-BA-5559-01 | C1 |
| TCGA-CN-A63U-01 | C1 |
| TCGA-CV-7095-01 | C1 |
| TCGA-CN-5358-01 | C1 |
| TCGA-CN-A6UY-01 | C1 |
| TCGA-KU-A66S-01 | C1 |
| TCGA-CN-6017-01 | C1 |
| TCGA-UF-A71B-01 | C1 |
| TCGA-CV-7438-01 | C1 |

|                 |    |
|-----------------|----|
| TCGA-CV-7242-01 | C1 |
| TCGA-CN-A6V3-01 | C1 |
| TCGA-QK-A8ZA-01 | C1 |
| TCGA-QK-A6VC-01 | C1 |
| TCGA-BB-A5HZ-01 | C1 |
| TCGA-HD-7754-01 | C1 |
| TCGA-H7-A6C4-01 | C1 |
| TCGA-P3-A5Q5-01 | C1 |
| TCGA-CN-4740-01 | C1 |
| TCGA-CV-A45Q-01 | C1 |
| TCGA-CR-7392-01 | C1 |
| TCGA-D6-A6EK-01 | C1 |
| TCGA-CR-7374-01 | C1 |
| TCGA-CR-7369-01 | C1 |
| TCGA-CR-5248-01 | C1 |
| TCGA-CV-6939-01 | C1 |
| TCGA-CV-7415-01 | C1 |
| TCGA-HD-A4C1-01 | C1 |
| TCGA-BB-4223-01 | C1 |
| TCGA-CV-5443-01 | C1 |
| TCGA-CN-5374-01 | C1 |
| TCGA-CX-7086-01 | C1 |
| TCGA-D6-A4Z9-01 | C1 |
| TCGA-TN-A7HJ-01 | C1 |
| TCGA-BB-8601-01 | C1 |
| TCGA-CR-7368-01 | C1 |
| TCGA-CV-7101-01 | C1 |
| TCGA-BB-A5HU-01 | C1 |
| TCGA-MZ-A5BI-01 | C1 |
| TCGA-CV-A6JM-01 | C1 |
| TCGA-CN-6012-01 | C1 |
| TCGA-HD-8314-01 | C1 |
| TCGA-CR-6467-01 | C1 |
| TCGA-DQ-7591-01 | C1 |
| TCGA-HD-8635-01 | C1 |
| TCGA-QK-A8Z7-01 | C1 |
| TCGA-CV-5432-01 | C1 |
| TCGA-P3-A6T7-01 | C1 |
| TCGA-BA-6869-01 | C1 |
| TCGA-BA-5153-01 | C1 |
| TCGA-CV-A45U-01 | C1 |
| TCGA-CV-A45X-01 | C1 |
| TCGA-QK-AA3J-01 | C1 |
| TCGA-UF-A71E-01 | C1 |
| TCGA-QK-A8ZB-01 | C1 |
| TCGA-CV-6941-01 | C1 |
| TCGA-HD-7229-01 | C1 |
| TCGA-CV-6953-01 | C1 |
| TCGA-CN-4722-01 | C1 |
| TCGA-F7-A622-01 | C1 |
| TCGA-CV-7252-01 | C1 |
| TCGA-CN-4726-01 | C1 |
| TCGA-P3-A6T4-01 | C1 |
| TCGA-CV-6945-01 | C1 |
| TCGA-BA-A4IG-01 | C1 |
| TCGA-UF-A71D-01 | C1 |
| TCGA-IQ-A61I-01 | C1 |
| TCGA-CX-A4AQ-01 | C1 |

|                 |    |
|-----------------|----|
| TCGA-CN-6010-01 | C1 |
| TCGA-CN-4742-01 | C1 |
| TCGA-T2-A6WZ-01 | C1 |
| TCGA-CN-6018-01 | C1 |
| TCGA-CR-6487-01 | C1 |
| TCGA-CV-7248-01 | C1 |
| TCGA-CR-7395-01 | C1 |
| TCGA-IQ-A61E-01 | C1 |
| TCGA-CN-5360-01 | C1 |
| TCGA-CN-5356-01 | C1 |
| TCGA-CN-6021-01 | C1 |
| TCGA-CN-4723-01 | C1 |
| TCGA-CV-5441-01 | C1 |
| TCGA-CN-4733-01 | C1 |
| TCGA-CQ-6223-01 | C1 |
| TCGA-CN-4739-01 | C1 |
| TCGA-F7-A623-01 | C1 |
| TCGA-CV-A45T-01 | C1 |
| TCGA-CN-6996-01 | C1 |
| TCGA-CV-6943-01 | C1 |
| TCGA-CQ-6225-01 | C1 |
| TCGA-CR-5249-01 | C1 |
| TCGA-P3-A6SW-01 | C1 |
| TCGA-HD-7831-01 | C1 |
| TCGA-CV-7411-01 | C1 |
| TCGA-CV-7238-01 | C1 |
| TCGA-CR-7364-01 | C1 |
| TCGA-CN-6020-01 | C1 |
| TCGA-CV-5431-01 | C1 |
| TCGA-CV-6936-01 | C1 |
| TCGA-F7-7848-01 | C1 |
| TCGA-CR-7389-01 | C1 |
| TCGA-CV-5973-01 | C1 |
| TCGA-QK-A6II-01 | C1 |
| TCGA-CN-6023-01 | C1 |
| TCGA-BB-8596-01 | C1 |
| TCGA-KU-A6H7-01 | C1 |
| TCGA-CV-A45Y-01 | C1 |
| TCGA-D6-A6ES-01 | C1 |
| TCGA-CN-4729-01 | C1 |
| TCGA-IQ-A61H-01 | C1 |
| TCGA-CV-7418-01 | C1 |
| TCGA-CN-5355-01 | C1 |
| TCGA-CV-7424-01 | C1 |
| TCGA-MT-A67D-01 | C1 |
| TCGA-CN-4735-01 | C1 |
| TCGA-CV-5970-01 | C1 |
| TCGA-CV-A465-01 | C1 |
| TCGA-CV-A6JY-01 | C1 |
| TCGA-BA-A4II-01 | C1 |
| TCGA-IQ-7632-01 | C1 |
| TCGA-IQ-A6SH-01 | C1 |
| TCGA-BB-4217-01 | C1 |
| TCGA-CV-A460-01 | C1 |
| TCGA-UF-A7JF-01 | C1 |
| TCGA-CR-7385-01 | C1 |
| TCGA-CR-7394-01 | C1 |
| TCGA-CR-7388-01 | C1 |

|                 |    |
|-----------------|----|
| TCGA-CX-7085-01 | C1 |
| TCGA-CR-6470-01 | C1 |
| TCGA-CX-7219-01 | C1 |
| TCGA-UP-A6WW-01 | C1 |
| TCGA-CV-7180-01 | C1 |
| TCGA-H7-A76A-01 | C1 |
| TCGA-BA-A6DI-01 | C1 |
| TCGA-F7-A61V-01 | C1 |
| TCGA-QK-AA3K-01 | C1 |
| TCGA-QK-A8Z8-01 | C1 |
| TCGA-D6-6824-01 | C1 |
| TCGA-BA-5151-01 | C1 |
| TCGA-CV-7410-01 | C1 |
| TCGA-CR-6482-01 | C1 |
| TCGA-CN-4738-01 | C1 |
| TCGA-CN-6013-01 | C1 |
| TCGA-CR-6477-01 | C1 |
| TCGA-BB-A5HY-01 | C1 |
| TCGA-CV-A45P-01 | C1 |
| TCGA-DQ-5631-01 | C1 |
| TCGA-BA-A6DD-01 | C1 |
| TCGA-CR-6492-01 | C1 |
| TCGA-T3-A92M-01 | C1 |
| TCGA-4P-AA8J-01 | C1 |
| TCGA-CV-7440-01 | C1 |
| TCGA-BA-5152-01 | C1 |
| TCGA-CV-7261-01 | C1 |
| TCGA-HD-7753-01 | C1 |
| TCGA-CQ-5323-01 | C1 |
| TCGA-CR-6481-01 | C1 |
| TCGA-CV-7250-01 | C1 |
| TCGA-UF-A718-01 | C1 |
| TCGA-BA-5558-01 | C1 |
| TCGA-CV-6937-01 | C1 |
| TCGA-CR-5243-01 | C1 |
| TCGA-HD-A6HZ-01 | C1 |
| TCGA-CR-7404-01 | C1 |
| TCGA-CN-A6V6-01 | C1 |
| TCGA-CR-6474-01 | C1 |
| TCGA-D6-8568-01 | C1 |
| TCGA-D6-A6EQ-01 | C1 |
| TCGA-CQ-A4C9-01 | C1 |
| TCGA-CV-A45W-01 | C1 |
| TCGA-BA-A8YP-01 | C1 |
| TCGA-D6-6823-01 | C1 |
| TCGA-MZ-A6I9-01 | C1 |
| TCGA-BB-4224-01 | C1 |
| TCGA-F7-A50I-01 | C1 |
| TCGA-CR-6480-01 | C1 |
| TCGA-CN-5369-01 | C1 |
| TCGA-CR-7402-01 | C1 |
| TCGA-CN-5363-01 | C1 |
| TCGA-CQ-6228-01 | C1 |
| TCGA-UF-A7JD-01 | C1 |
| TCGA-T2-A6X0-01 | C1 |
| TCGA-CR-7373-01 | C1 |
| TCGA-CV-7435-01 | C1 |
| TCGA-CN-5361-01 | C2 |

|                 |    |
|-----------------|----|
| TCGA-CR-7391-01 | C2 |
| TCGA-CV-5436-01 | C2 |
| TCGA-CV-6441-01 | C2 |
| TCGA-CV-6948-01 | C2 |
| TCGA-CV-6962-01 | C2 |
| TCGA-F7-8489-01 | C2 |
| TCGA-CQ-5327-01 | C2 |
| TCGA-CV-7423-01 | C2 |
| TCGA-CV-7100-01 | C2 |
| TCGA-MZ-A7D7-01 | C2 |
| TCGA-CQ-A4CI-01 | C2 |
| TCGA-D6-6825-01 | C2 |
| TCGA-CV-7413-01 | C2 |
| TCGA-CX-7082-01 | C2 |
| TCGA-MT-A51X-01 | C2 |
| TCGA-CQ-5324-01 | C2 |
| TCGA-CV-6433-01 | C2 |
| TCGA-P3-A6T0-01 | C2 |
| TCGA-CR-7399-01 | C2 |
| TCGA-CQ-7065-01 | C2 |
| TCGA-CN-4741-01 | C2 |
| TCGA-CN-A499-01 | C2 |
| TCGA-CR-6473-01 | C2 |
| TCGA-CV-6003-01 | C2 |
| TCGA-IQ-A6SG-01 | C2 |
| TCGA-CN-4727-01 | C2 |
| TCGA-F7-A61S-01 | C2 |
| TCGA-CN-4725-01 | C2 |
| TCGA-C9-A480-01 | C2 |
| TCGA-CR-7393-01 | C2 |
| TCGA-BA-A6DG-01 | C2 |
| TCGA-CQ-6227-01 | C2 |
| TCGA-BB-A6UO-01 | C2 |
| TCGA-CQ-5329-01 | C2 |
| TCGA-P3-A6SX-01 | C2 |
| TCGA-BA-A6DB-01 | C2 |
| TCGA-CQ-A4CD-01 | C2 |
| TCGA-BA-4077-01 | C2 |
| TCGA-BA-4075-01 | C2 |
| TCGA-CV-7255-01 | C2 |
| TCGA-BA-A4IF-01 | C2 |
| TCGA-CV-A6JZ-01 | C2 |
| TCGA-BA-A6DJ-01 | C2 |
| TCGA-CN-6019-01 | C2 |
| TCGA-CN-4728-01 | C2 |
| TCGA-CV-5444-01 | C2 |
| TCGA-CQ-6222-01 | C2 |
| TCGA-F7-A50G-01 | C2 |
| TCGA-CQ-5332-01 | C2 |
| TCGA-C9-A47Z-01 | C2 |
| TCGA-CV-7434-01 | C2 |
| TCGA-QK-A8Z9-01 | C2 |
| TCGA-KU-A66T-01 | C2 |
| TCGA-CQ-6221-01 | C2 |
| TCGA-BA-6871-01 | C2 |
| TCGA-CR-6472-01 | C2 |
| TCGA-CN-6016-01 | C2 |
| TCGA-CQ-5326-01 | C2 |

|                 |    |
|-----------------|----|
| TCGA-IQ-A61J-01 | C2 |
| TCGA-CV-A45V-01 | C2 |
| TCGA-CV-7102-01 | C2 |
| TCGA-BB-4228-01 | C2 |
| TCGA-QK-A6V9-01 | C2 |
| TCGA-DQ-7592-01 | C2 |
| TCGA-CN-5366-01 | C2 |
| TCGA-QK-A6IG-01 | C2 |
| TCGA-UF-A7JO-01 | C2 |
| TCGA-CV-5435-01 | C2 |
| TCGA-CQ-6218-01 | C2 |
| TCGA-CV-7414-01 | C2 |
| TCGA-P3-A5QE-01 | C2 |
| TCGA-QK-A6IH-01 | C2 |
| TCGA-BA-4078-01 | C2 |
| TCGA-CV-7432-01 | C2 |
| TCGA-CQ-A4C6-01 | C2 |
| TCGA-CV-5979-01 | C2 |
| TCGA-CN-6997-01 | C2 |
| TCGA-DQ-7588-01 | C2 |
| TCGA-CN-4734-01 | C2 |
| TCGA-CV-7183-01 | C2 |
| TCGA-BA-5556-01 | C2 |
| TCGA-CV-7177-01 | C2 |
| TCGA-D6-A6EP-01 | C2 |
| TCGA-D6-6515-01 | C2 |
| TCGA-CV-7178-01 | C2 |
| TCGA-CV-6951-01 | C2 |
| TCGA-CQ-7069-01 | C2 |
| TCGA-CN-5364-01 | C2 |
| TCGA-CV-A6JT-01 | C2 |
| TCGA-HD-A6IO-01 | C2 |
| TCGA-CN-6998-01 | C2 |
| TCGA-CR-6491-01 | C2 |
| TCGA-P3-A6T3-01 | C2 |
| TCGA-CR-7365-01 | C2 |
| TCGA-CV-7097-01 | C2 |
| TCGA-UF-A7J9-01 | C2 |
| TCGA-CN-5367-01 | C2 |
| TCGA-CV-6960-01 | C2 |
| TCGA-BA-A6DE-01 | C2 |
| TCGA-CQ-7063-01 | C2 |
| TCGA-CR-7386-01 | C2 |
| TCGA-T3-A92N-01 | C2 |
| TCGA-CV-6934-01 | C2 |
| TCGA-CQ-7072-01 | C2 |
| TCGA-CN-6994-01 | C2 |
| TCGA-P3-A6T2-01 | C2 |
| TCGA-BA-4076-01 | C2 |
| TCGA-CN-5373-01 | C2 |
| TCGA-CR-6471-01 | C2 |
| TCGA-UF-A7JS-01 | C2 |
| TCGA-CV-A464-01 | C2 |
| TCGA-CQ-5330-01 | C2 |
| TCGA-CV-7253-01 | C2 |
| TCGA-CV-5442-01 | C2 |
| TCGA-CQ-A4CB-01 | C2 |
| TCGA-CV-7407-01 | C2 |

|                 |    |
|-----------------|----|
| TCGA-CR-7401-01 | C2 |
| TCGA-UF-A7JK-01 | C2 |
| TCGA-CQ-6229-01 | C2 |
| TCGA-BB-A6UM-01 | C2 |
| TCGA-CV-6940-01 | C2 |
| TCGA-CV-6956-01 | C2 |
| TCGA-CN-A641-01 | C2 |
| TCGA-BB-4227-01 | C2 |
| TCGA-CV-A45O-01 | C2 |
| TCGA-QK-A652-01 | C2 |
| TCGA-CV-A45Z-01 | C2 |
| TCGA-CV-7421-01 | C2 |
| TCGA-CV-A6JN-01 | C2 |
| TCGA-CV-5977-01 | C2 |
| TCGA-CN-6995-01 | C2 |
| TCGA-CV-6961-01 | C2 |
| TCGA-CV-7430-01 | C2 |
| TCGA-CV-6954-01 | C2 |
| TCGA-RS-A6TO-01 | C2 |
| TCGA-CN-A63V-01 | C2 |
| TCGA-CN-6011-01 | C2 |
| TCGA-CV-7245-01 | C2 |
| TCGA-CR-6488-01 | C2 |
| TCGA-CV-7104-01 | C2 |
| TCGA-CV-7090-01 | C2 |
| TCGA-CV-5971-01 | C2 |
| TCGA-CV-7089-01 | C2 |
| TCGA-D6-A6EN-01 | C2 |
| TCGA-P3-A6T6-01 | C2 |
| TCGA-UF-A7JA-01 | C2 |
| TCGA-CR-7383-01 | C2 |
| TCGA-D6-8569-01 | C2 |
| TCGA-MT-A67F-01 | C2 |
| TCGA-CV-7429-01 | C2 |
| TCGA-CV-7236-01 | C2 |
| TCGA-UF-A7JV-01 | C2 |
| TCGA-P3-A6T8-01 | C2 |
| TCGA-CV-A6K0-01 | C2 |
| TCGA-CV-6955-01 | C2 |
| TCGA-IQ-A61G-01 | C2 |
| TCGA-IQ-7630-01 | C2 |
| TCGA-IQ-A61O-01 | C2 |
| TCGA-BA-A4IH-01 | C2 |
| TCGA-T2-A6X2-01 | C2 |
| TCGA-BB-4225-01 | C2 |
| TCGA-F7-A61W-01 | C2 |
| TCGA-CV-7428-01 | C2 |
| TCGA-MT-A51W-01 | C2 |
| TCGA-CR-7376-01 | C2 |
| TCGA-BA-6872-01 | C2 |
| TCGA-CV-5434-01 | C2 |
| TCGA-CN-6024-01 | C2 |
| TCGA-CV-5966-01 | C2 |
| TCGA-WA-A7GZ-01 | C2 |
| TCGA-CQ-6219-01 | C2 |
| TCGA-UF-A7JC-01 | C2 |
| TCGA-CV-7437-01 | C2 |
| TCGA-CV-A461-01 | C2 |

|                 |    |
|-----------------|----|
| TCGA-CQ-5334-01 | C2 |
| TCGA-CV-7235-01 | C2 |
| TCGA-UF-A71A-01 | C2 |
| TCGA-QK-A6VB-01 | C2 |
| TCGA-CV-5976-01 | C2 |
| TCGA-BA-A6D8-01 | C2 |
| TCGA-CN-A642-01 | C2 |
| TCGA-HD-A634-01 | C2 |
| TCGA-CN-A49A-01 | C2 |
| TCGA-P3-A6T5-01 | C2 |
| TCGA-TN-A7HL-01 | C2 |
| TCGA-CN-A6V7-01 | C2 |
| TCGA-CR-7397-01 | C2 |
| TCGA-CV-7406-01 | C2 |
| TCGA-CQ-A4C7-01 | C2 |
| TCGA-F7-A50J-01 | C2 |
| TCGA-CN-4730-01 | C2 |
| TCGA-CV-A6K2-01 | C2 |
| TCGA-CR-5247-01 | C2 |
| TCGA-CN-4736-01 | C2 |
| TCGA-CV-7433-01 | C2 |
| TCGA-P3-A5QA-01 | C2 |
| TCGA-D6-6827-01 | C2 |
| TCGA-P3-A5QF-01 | C2 |
| TCGA-CV-6938-01 | C2 |
| TCGA-IQ-7631-01 | C2 |
| TCGA-MT-A67A-01 | C2 |
| TCGA-HD-8634-01 | C2 |
| TCGA-CR-6493-01 | C2 |
| TCGA-CV-7568-01 | C2 |
| TCGA-HD-A633-01 | C2 |
| TCGA-CV-7099-01 | C2 |
| TCGA-BA-A6DA-01 | C2 |
| TCGA-CV-7091-01 | C2 |
| TCGA-CN-A49B-01 | C2 |
| TCGA-UF-A7JH-01 | C2 |
| TCGA-CQ-6224-01 | C2 |
| TCGA-CV-A6JO-01 | C2 |
| TCGA-CV-5439-01 | C2 |
| TCGA-BA-5555-01 | C2 |
| TCGA-CN-A63W-01 | C2 |
| TCGA-CN-6989-01 | C2 |
| TCGA-CV-7247-01 | C2 |
| TCGA-CV-7422-01 | C2 |
| TCGA-CR-7372-01 | C2 |
| TCGA-CV-7103-01 | C2 |
| TCGA-BA-4074-01 | C2 |
| TCGA-DQ-5625-01 | C2 |
| TCGA-CR-7398-01 | C2 |
| TCGA-CV-7416-01 | C2 |
| TCGA-BA-6868-01 | C2 |
| TCGA-CN-5359-01 | C2 |
| TCGA-KU-A6H8-01 | C2 |
| TCGA-CQ-7068-01 | C2 |
| TCGA-CN-5365-01 | C2 |
| TCGA-CN-6022-01 | C2 |
| TCGA-CV-A6JE-01 | C2 |
| TCGA-CV-6933-01 | C2 |



|                 |    |
|-----------------|----|
| TCGA-CV-6950-01 | C2 |
| TCGA-P3-A5Q6-01 | C2 |
| TCGA-CV-7425-01 | C2 |
| TCGA-CQ-6220-01 | C2 |
| TCGA-D6-A6EM-01 | C2 |
| TCGA-HD-8224-01 | C2 |
| TCGA-CR-7382-01 | C2 |
| TCGA-CV-A6JD-01 | C2 |
| TCGA-T2-A6WX-01 | C2 |
| TCGA-CV-7446-01 | C2 |
| TCGA-CV-A6K1-01 | C2 |
| TCGA-CN-4731-01 | C2 |
| TCGA-CV-A6JU-01 | C2 |
| TCGA-CQ-A4CG-01 | C2 |
| TCGA-CN-A49C-01 | C2 |
| TCGA-BA-5557-01 | C2 |
| TCGA-HD-7832-01 | C2 |
| TCGA-F7-A624-01 | C2 |
| TCGA-H7-8501-01 | C2 |
| TCGA-CV-7427-01 | C2 |
| TCGA-CN-5370-01 | C2 |
| TCGA-CN-4737-01 | C2 |
| TCGA-F7-8298-01 | C2 |
| TCGA-DQ-5630-01 | C2 |
| TCGA-RS-A6TP-01 | C2 |
| TCGA-CQ-5331-01 | C2 |
| TCGA-CV-A45R-01 | C2 |
| TCGA-H7-8502-01 | C2 |
| TCGA-CV-5440-01 | C2 |
| TCGA-CN-6988-01 | C2 |
| TCGA-H7-7774-01 | C2 |
| TCGA-D6-6516-01 | C2 |
| TCGA-HL-7533-01 | C2 |
| TCGA-QK-A64Z-01 | C2 |
| TCGA-BA-7269-01 | C2 |
| TCGA-CQ-5333-01 | C2 |
